# Supplementary material
Source: PubMed Central journal article supplement (PMC10348805)
Supplement: NIHMS1901441-supplement-6.pdf [file NIHMS1901441-supplement-6.pdf]

|    | Screening with Insv-BEN in the <i>Drosophila</i> proteome |         | Screening with Insv-BEN in the mouse proteome |         |    | Screening with BEND3-BEN4 in the <i>Drosophila</i> proteome |         | Screening with BEND3-BEN4 in the mouse proteome |         |
|----|-----------------------------------------------------------|---------|-----------------------------------------------|---------|----|-------------------------------------------------------------|---------|-------------------------------------------------|---------|
|    | <i>Drosophila</i> Protein                                 | Z-score | Mouse protein                                 | Z-score |    | <i>Drosophila</i> Protein                                   | Z-score | Mouse protein                                   | Z-score |
| 1  | Elba2                                                     | 14.9    | Bend6                                         | 13.2    | 1  | Elba2                                                       | Bend3   | 17.5                                            |         |
| 2  | insv                                                      | 13.6    | Bend5                                         | 12.7    | 2  | pre-mod(mdg4)-C                                             | Banp    | 10.3                                            |         |
| 3  | Bsg25A                                                    | 12.4    | Banp                                          | 12.6    | 3  | insv                                                        | Bend5   | 9.5                                             |         |
| 4  | pre-mod(mdg4)-C                                           | 8.1     | Nacc1                                         | 12.4    | 4  | Bsg25A                                                      | Gm15262 | 9.2                                             |         |
| 5  | CG17341                                                   | 7.3     | Bend7                                         | 12.3    | 5  | PNPase                                                      | Bend6   | 9.0                                             |         |
| 6  | CG42854                                                   | 5.8     | Nacc2                                         | 12.1    | 6  | CG17341                                                     | Nacc1   | 8.2                                             |         |
| 7  | PNPase                                                    | 5.6     | Bend4                                         | 11.3    | 7  | Fip1                                                        | Bend7   | 7.9                                             |         |
| 8  | CG12112                                                   | 5.1     | Gm15262                                       | 10.4    | 8  | atl                                                         | Nacc2   | 7.8                                             |         |
| 9  | CG31367                                                   | 5.1     | Bend3                                         | 8.0     | 9  |                                                             | Bend4   | 7.7                                             |         |
| 10 | ey                                                        | 4.9     | Tcerg1l                                       | 5.2     | 10 |                                                             | Nat8    | 4.2                                             |         |
| 11 | bcd                                                       | 4.8     | Nol4l                                         | 5.1     | 11 |                                                             | Exoc8   | 4.2                                             |         |
| 12 | stops                                                     | 4.8     | Tcerg1                                        | 5.0     | 12 |                                                             | Scg3    | 4.1                                             |         |
| 13 | B-H1                                                      | 4.8     | Dmbx1                                         | 4.6     | 13 |                                                             | Nat8f2  | 4.0                                             |         |
| 14 | Fip1                                                      | 4.8     | Hoxc9                                         | 4.5     | 14 |                                                             | Krtcap2 | 4.0                                             |         |
| 15 | ftz                                                       | 4.8     | Lbx1                                          | 4.4     | 15 |                                                             | Gbp9    | 4.0                                             |         |
| 16 | tup                                                       | 4.7     | Hoxd1                                         | 4.4     |    |                                                             |         |                                                 |         |
| 17 | ro                                                        | 4.6     | Meis3                                         | 4.4     |    |                                                             |         |                                                 |         |
| 18 | eve                                                       | 4.5     | Hoxa9                                         | 4.4     |    |                                                             |         |                                                 |         |
| 19 | Lmx1a                                                     | 4.5     | Lhx9                                          | 4.4     |    |                                                             |         |                                                 |         |
| 20 | Vsx2                                                      | 4.5     | Pou6f2                                        | 4.3     |    |                                                             |         |                                                 |         |
| 21 | pdm3                                                      | 4.4     | Scg3                                          | 4.3     |    |                                                             |         |                                                 |         |
| 22 | B-H2                                                      | 4.4     | Hoxa3                                         | 4.3     |    |                                                             |         |                                                 |         |
| 23 | anon-37Cs                                                 | 4.3     | Gsc                                           | 4.3     |    |                                                             |         |                                                 |         |
| 24 | CG11085                                                   | 4.3     | Hoxa7                                         | 4.3     |    |                                                             |         |                                                 |         |
| 25 | Dfd                                                       | 4.3     | Hoxc11                                        | 4.3     |    |                                                             |         |                                                 |         |
| 26 | gsb                                                       | 4.2     | Evx1                                          | 4.3     |    |                                                             |         |                                                 |         |
| 27 | unc-4                                                     | 4.2     | Zhx1                                          | 4.3     |    |                                                             |         |                                                 |         |
| 28 | exex                                                      | 4.2     | Six1                                          | 4.3     |    |                                                             |         |                                                 |         |
| 29 | unpg                                                      | 4.2     | Lhx1                                          | 4.2     |    |                                                             |         |                                                 |         |
| 30 | E5                                                        | 4.2     | Nkx2-3                                        | 4.2     |    |                                                             |         |                                                 |         |
| 31 | lbe                                                       | 4.2     | Hlx                                           | 4.2     |    |                                                             |         |                                                 |         |
| 32 | toe                                                       | 4.2     | Isl1                                          | 4.2     |    |                                                             |         |                                                 |         |
| 33 | en                                                        | 4.2     | Zhx3                                          | 4.2     |    |                                                             |         |                                                 |         |
| 34 | GlnRS                                                     | 4.2     | Pou1f1                                        | 4.2     |    |                                                             |         |                                                 |         |
| 35 | Tig                                                       | 4.2     | Emx2                                          | 4.2     |    |                                                             |         |                                                 |         |
| 36 | CG13141                                                   | 4.1     | Pax6                                          | 4.2     |    |                                                             |         |                                                 |         |
| 37 | Vsx1                                                      | 4.1     | Hoxd3                                         | 4.2     |    |                                                             |         |                                                 |         |
| 38 | Dr                                                        | 4.1     | Hoxd9                                         | 4.1     |    |                                                             |         |                                                 |         |
| 39 | nub                                                       | 4.1     | Pknox1                                        | 4.1     |    |                                                             |         |                                                 |         |
| 40 | Lim1                                                      | 4.0     | Hesx1                                         | 4.1     |    |                                                             |         |                                                 |         |
| 41 | so                                                        | 4.0     | Gbp5                                          | 4.1     |    |                                                             |         |                                                 |         |
| 42 | CG34031                                                   | 4.0     | Hoxa11                                        | 4.1     |    |                                                             |         |                                                 |         |
| 43 | oc                                                        | 4.0     | Pitx2                                         | 4.1     |    |                                                             |         |                                                 |         |
| 44 | CG4196                                                    | 4.0     | Pde3a                                         | 4.0     |    |                                                             |         |                                                 |         |
| 45 | lbl                                                       | 4.0     | Q8K2W9                                        | 4.0     |    |                                                             |         |                                                 |         |
| 46 | Rx                                                        | 4.0     | Meis2                                         | 4.0     |    |                                                             |         |                                                 |         |
| 47 | eyg                                                       | 4.0     | Vsx1                                          | 4.0     |    |                                                             |         |                                                 |         |
| 48 |                                                           |         | Lmx1b                                         | 4.0     |    |                                                             |         |                                                 |         |
| 49 |                                                           |         | Nkx6-3                                        | 4.0     |    |                                                             |         |                                                 |         |
| 50 |                                                           |         | Six3                                          | 4.0     |    |                                                             |         |                                                 |         |
| 51 |                                                           |         | Emx1                                          | 4.0     |    |                                                             |         |                                                 |         |
| 52 |                                                           |         | Pou4f3                                        | 4.0     |    |                                                             |         |                                                 |         |

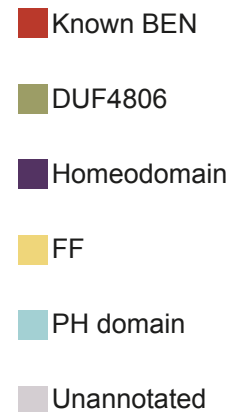

**Figure S1. Structural comparisons reveal BEN domains across species. Related to Figure 1, Data S1A, S1B, S1F and S1G.** Structure comparisons are performed between X-ray determined BEN domain structures and AlphaFold predicted models of different species. In particular, the human BEND3-BEN4 structure (PDB: 7W27) was screened in the *Drosophila* proteome, while the *Drosophila* Insv-BEN (PDB: 4IX7) was screened in the mouse proteome. Annotate domains are highlighted with indicated colors.

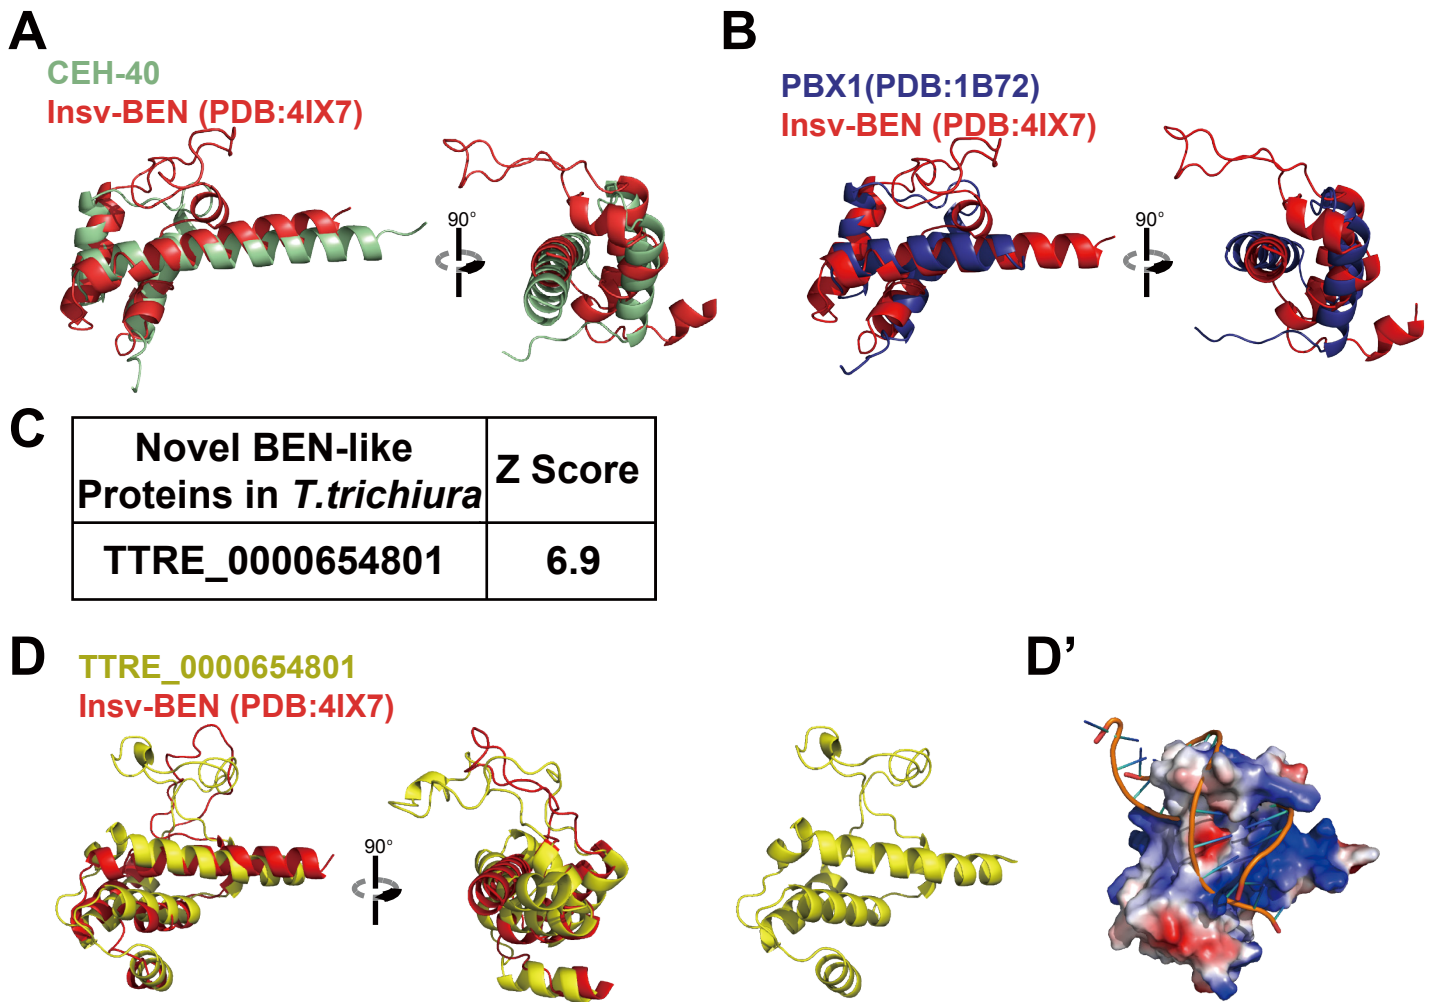

**Figure S2. Structure comparisons between the experimentally solved structure of Insv-BEN and AlphaFold predicted models in worms. Related to Figure 2, Data S4A, S4P and S4Q. (A)** Structure comparison between the AlphaFold predicted model of CEH-40, a PBX type homeodomain protein, and the solved structure of Insv-BEN (PDB:4IX7). **(B)** Structure comparison between the solved structure of human PBX1 homeodomain (PDB:1B72) and Insv-BEN. **(C)** Structure comparison with Insv-BEN reveals a novel BEN domain the *T. trichiura* proteome. **(D)** Superposition of the structure of Insv-BEN and the predicted model of TTRE\_0000654801. The structure prediction also reveals the electrostatic surface potential of this BEN-like domain in complex with the Insv-BEN targeting DNA.



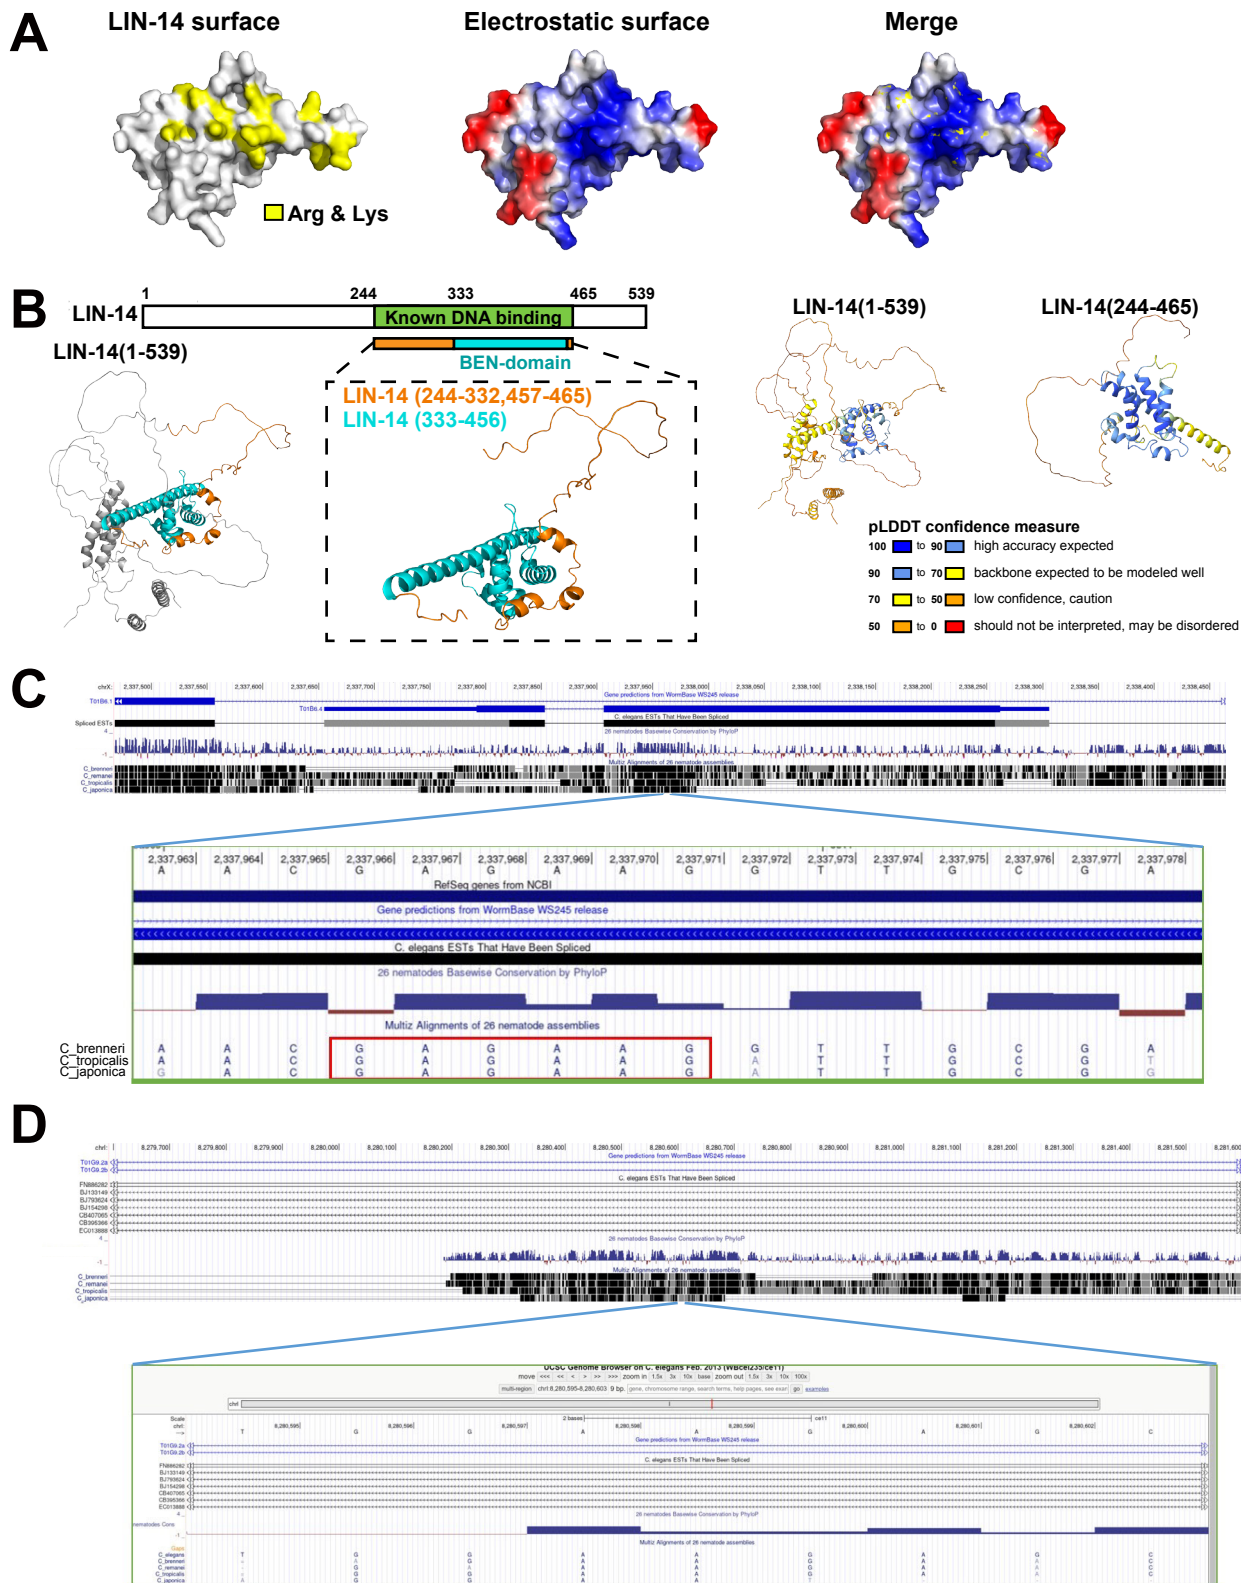

**Figure S3. LIN-14 is a novel BEN domain. Related to Figure 2. (A)** The distribution of Lys and Arg residues (yellow) in the  $\alpha 5$  helix of LIN-14 BEN domain with electrostatic surface view. **(B)** The region comprising amino acids 244-332 of LIN-14 is predicted to be disordered, while amino acids 244-465 has been previously identified as a DNA-binding region. Structure comparisons reveal that the region between amino acids 333 and 465 contains a BEN domain (also shown in Figure 2G-I'). **(C-D)** LIN-14 binding sites on *nlp-45* and *dma-1* genes contain conserved GA-rich LIN-14 targeting DNA motif.

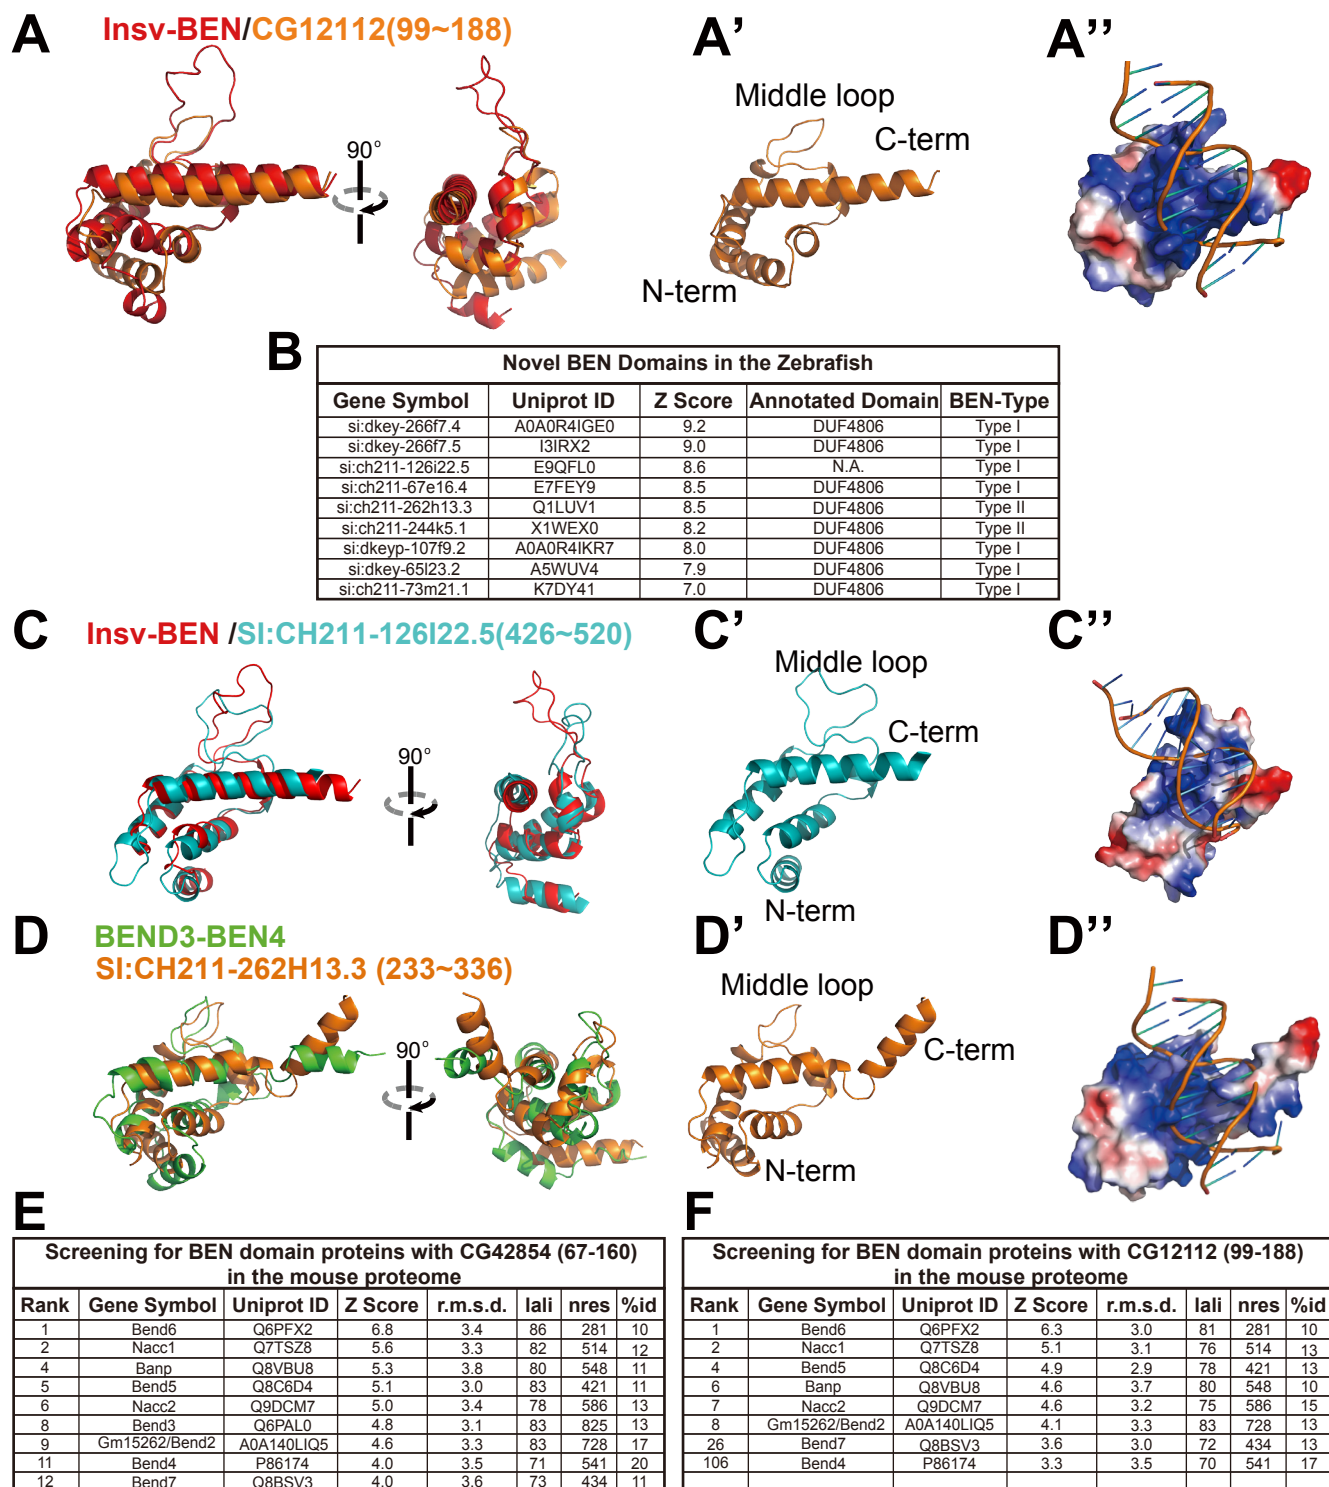

**Figure S4. Identification of novel BEN-like structures in *Drosophila* and zebrafish. Related to Figure3, Data S3B, S3C, S4A, S4H, S4R and S4H. (A-A')** Superposition of the solved structure of Insv-BEN (PDB:4IX7, red) and the predicted model of CG12112. **(A'')** shows the electrostatic surface potential of the CG12112 BEN-like structure in complex with the Insv targeting DNA. **(B)** Zebrafish proteins containing BEN-like structures revealed by structure comparisons. Except for E9QFLO, all the rest BEN-like regions overlap with presumed DUF4806 motifs. **(C-C')** Superposition of Insv-BEN (PDB: 4IX7, red) and the predicted model of zebrafish SI:CH211-126I22.5 (426~520). **(C'')** shows the electrostatic surface potential of the SI: CH211-126I22.5 (426~520) BEN-like region in complex with the Insv-BEN targeting DNA. **(D-D')** Superposition of the structure of BEND3-BEN4 (PDB:7W27, green) and the predicted model of zebrafish SI: CH211-262H13.3 (233~336). **(D'')** shows the electrostatic surface potential of the SI:Ch211-262H13.3 BEN-like region in complex with the BEND3-BEN4 targeting DNA. **(E-F)** Structure screening reveal proteins with DUF4806-like structures in the mouse proteome. Predicted models of DUF4806 (with the downstream  $\alpha 5$  helices) of *Drosophila* CG42854 and CG12112 were used to screen for proteins with 3D similarities. Both queries revealed known BEN-containing factors.

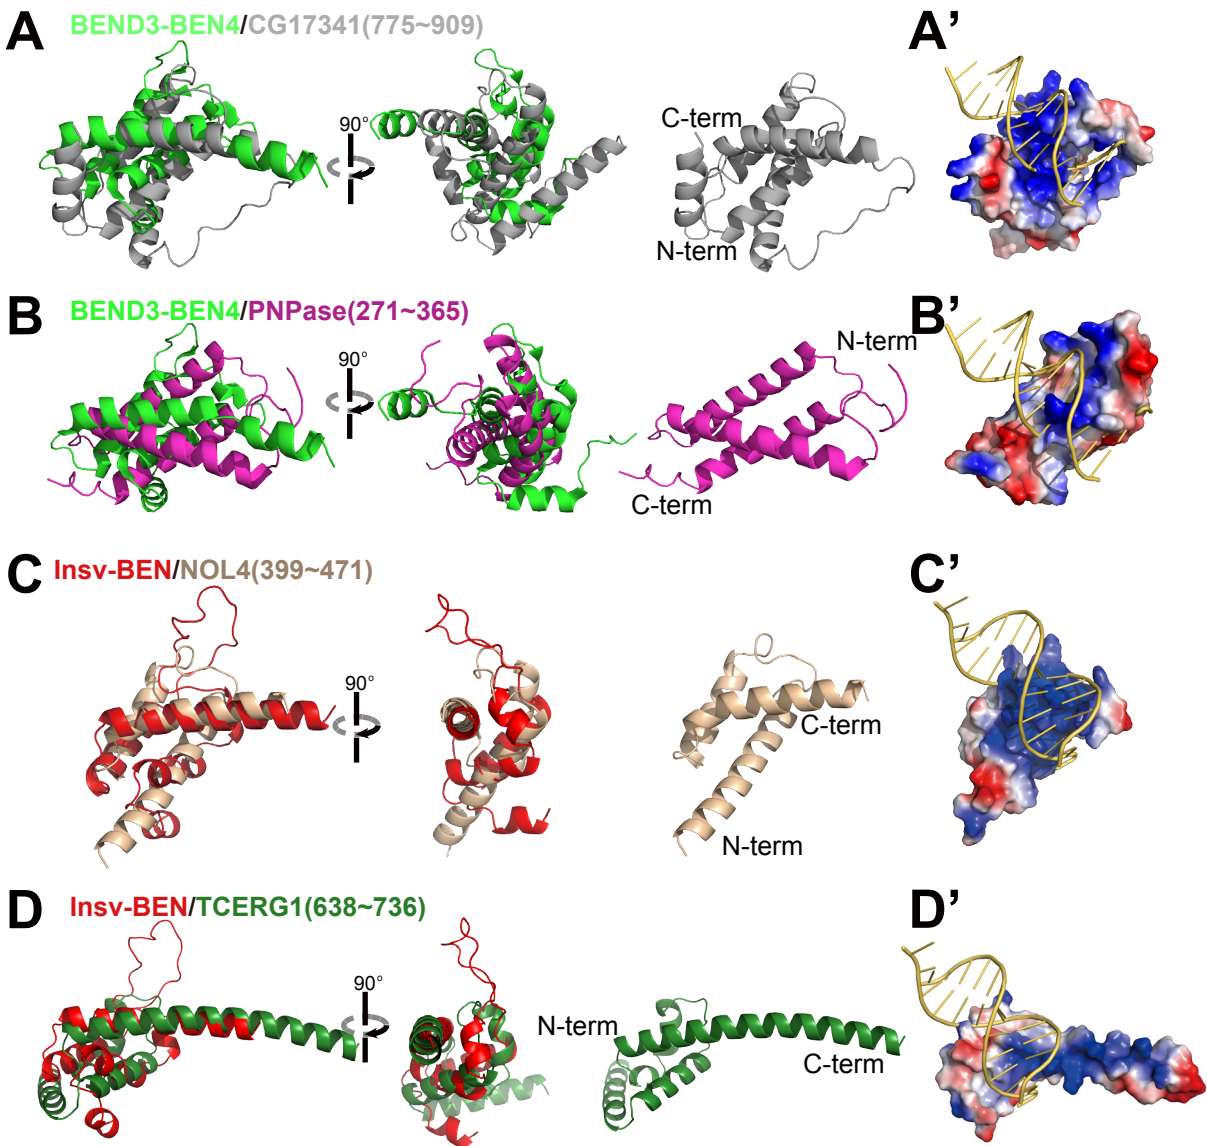

**Figure S5. Structure comparisons reveal the similarity between BEN domain and HTH motif. Related to Figure 5, Data S4A, S4T-S4W.** (A) Superposition of the structure of BEND3-BEN4 (PDB: 7W27, green) and the predicted model of *Drosophila* CG17341 (775~909). While the amino acids 775-909 in CG17341 is highly structured and have an HTH core, it has not been previously annotated with a known domain. (B) Superposition of the structure of BEND3-BEN4 (PDB: 7W27, green) and the predicted model of *Drosophila* PNPase (271~365). The amino acids 272-365 in PNPase have been annotated as a PH domain (also Polyribonucleotide nucleotidyltransferase, RNA-binding domain). (C) Superposition of the structure of Insv BEN domain (PDB: 4IX7, red) and the predicted model of mouse NOL4 (388~471). While the amino acids 388-471 in NOL4 is structured and have an HTH core, it has not been previously annotated as a known. (D) Superposition of the structure of Insv-BEN (PDB: 4IX7, red) and the predicted model of mouse TCERG1. The amino acids (638~736) in TCERG1 have been annotated as a FF1 domain.



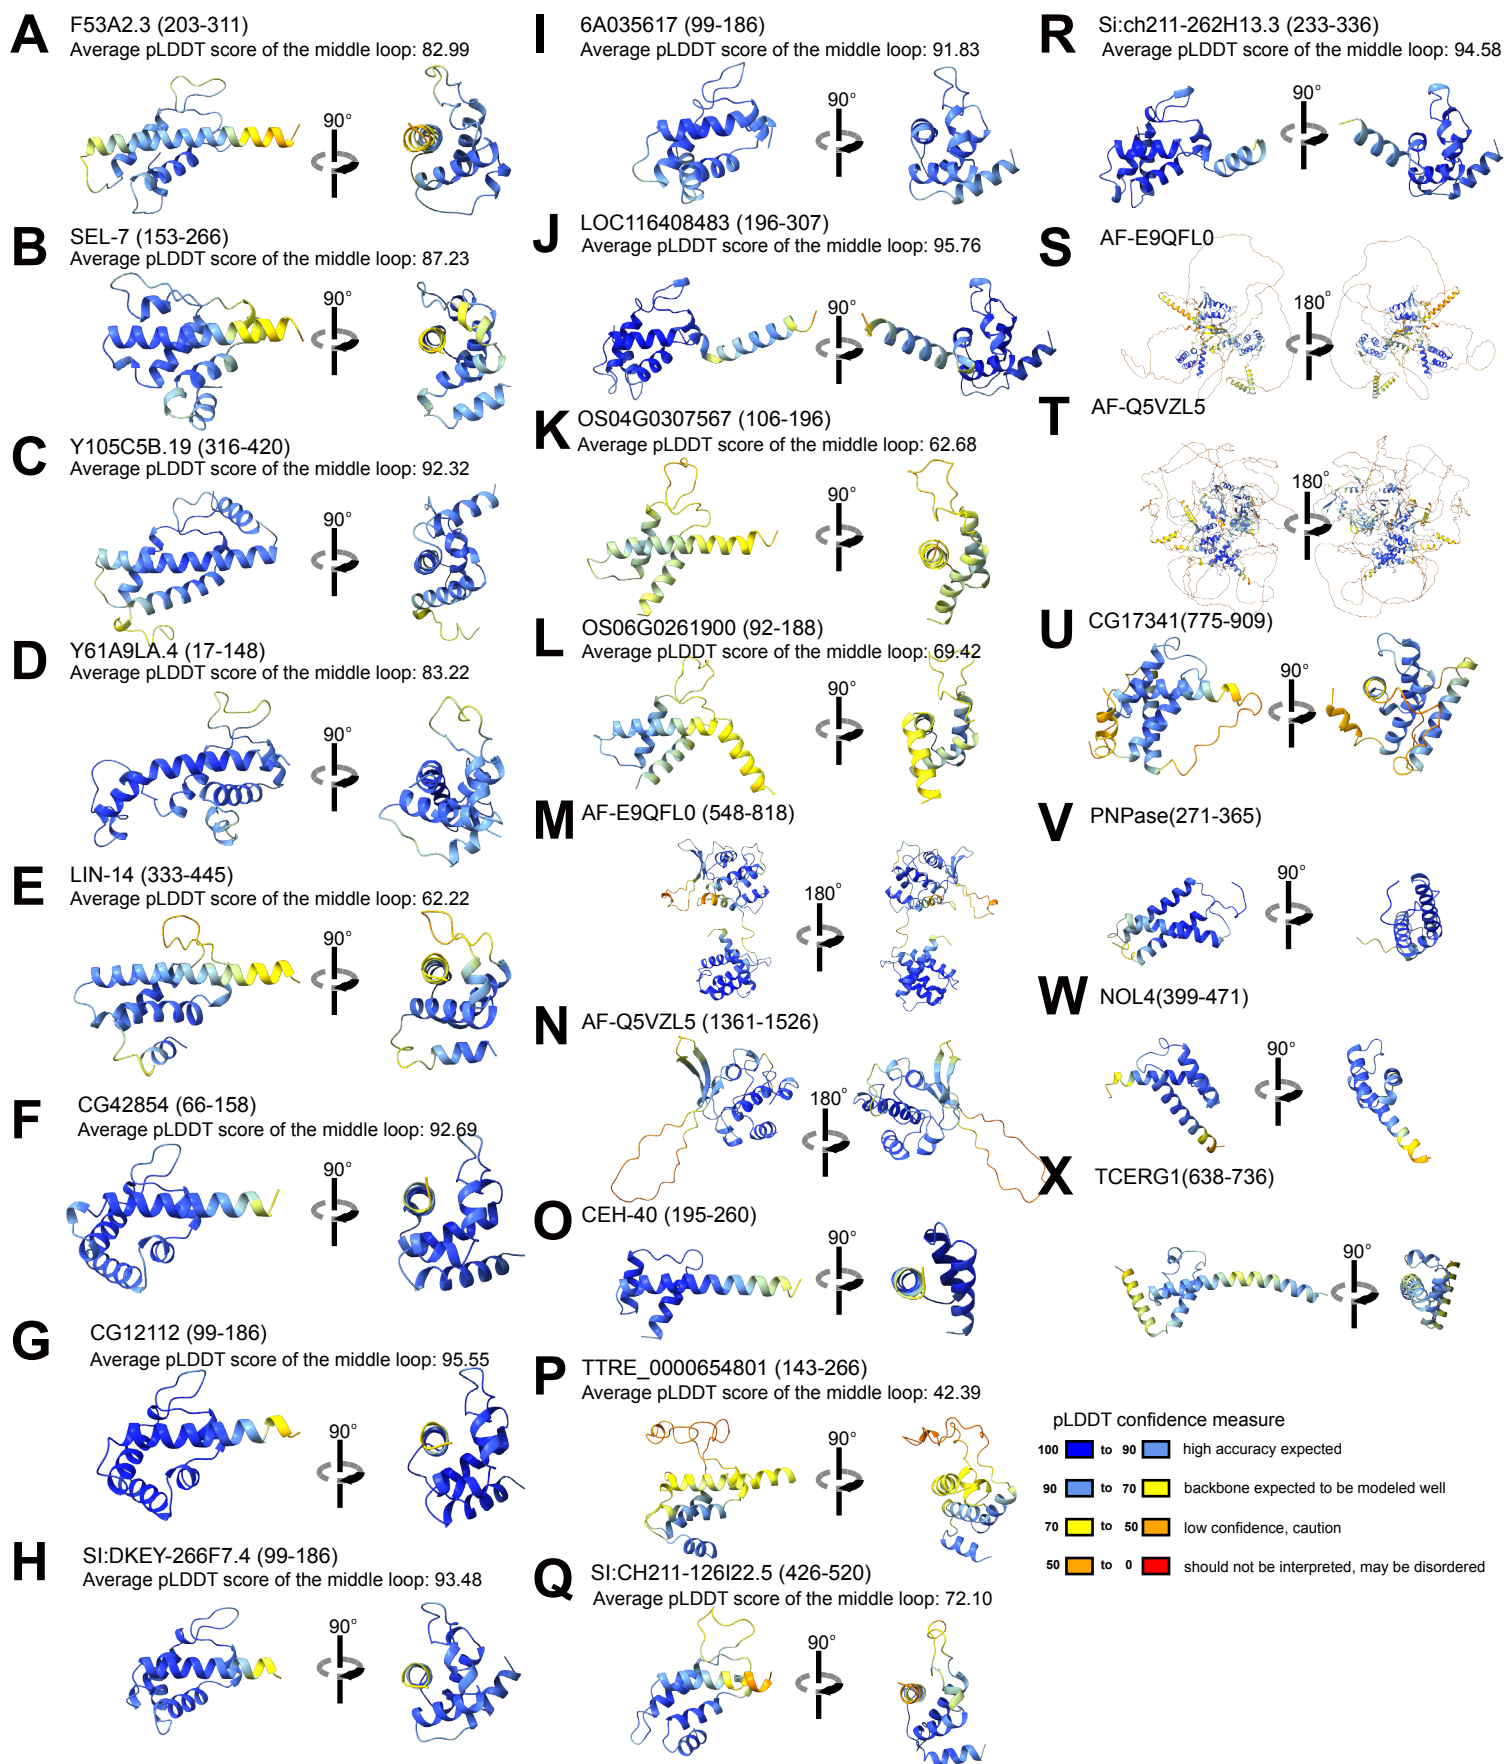

**Figure S6. AlphaFold predicts BEN/BEN-like structures with high confidence. Related to Figure 2B-2E, 2H, 3B, 3E-3J, 5F, 5G, 6C, 6F, S2A, S2D, S4A, S4C, S4D, S5A-D and Data S4B-S4W.** AlphaFold predicted models presented in this paper are colored with pLDDT scores. The average pLDDT scores of middle loops are calculated accordingly.
